# Supplementary material
Source: MDPI journal article supplement (https://www.mdpi.com/2673-4583/5/1/59)
Supplement: s1 [file s1]

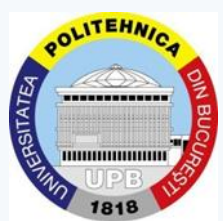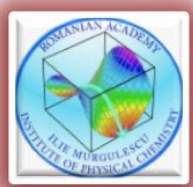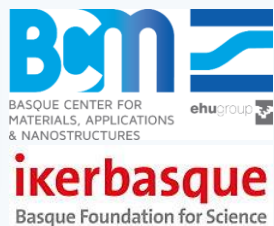

**1<sup>st</sup> International Electronic Conference on Chemical Sensors and Analytical Chemistry - CSAC2021 | 01 - 15 July 2021 | Online**

# Antimony tin oxide – Prussian blue screen-printed electrodes for electrochemical sensing of potassium ions

**Cecilia Lete <sup>1</sup>, Mariana Marin <sup>1</sup>, Francisco Javier del Campo<sup>2,3\*</sup>, Ioana Diaconu <sup>4</sup>, Stelian Lupu <sup>4,\*</sup>**

1. Institute of Physical Chemistry “Ilie Murgulescu” of the Romanian Academy, 202 Splaiul Independentei, 060021 Bucharest, Romania; [clete@chimfiz.icf.ro](mailto:clete@chimfiz.icf.ro); [mmaria@icf.ro](mailto:mmaria@icf.ro)
2. BCMaterials, Basque Center for Materials, Applications and Nanostructures, UPV/EHU Science Park, 48940, Leioa, Spain; [javier.delcampo@bcmaterials.net](mailto:javier.delcampo@bcmaterials.net)
3. Ikerbasque Basque Foundation for Science, Plaza Euskadi 5, 48009 Bilbao, Spain.
4. University Politehnica of Bucharest, Faculty of Applied Chemistry and Materials Science, Department of Analytical Chemistry and Environmental Engineering, 1-7 Gh. Polizu Street, 011061 Bucharest, Romania; [ioana.diaconu@upb.ro](mailto:ioana.diaconu@upb.ro); [stelian.lupu@upb.ro](mailto:stelian.lupu@upb.ro)

# Objectives

- Development of screen-printed electrodes (SPEs) based on antimony tin oxide nanoparticles (ATO) – Prussian blue (PB) composite materials.
- Electrochemical characterization of ATO-PB-SPEs.
- Analytical applications towards the detection of caffeic acid and potassium ions.

## Experimental section

- Cyclic voltammetry (CV), chronoamperometry (CA), electrochemical impedance spectroscopy (EIS) techniques have been applied in the investigation of the electrochemical properties of the ATO-PB materials.
- Influence of pH and potassium ions on ATO-PB electrochemical behavior was investigated by means of CV and EIS techniques.

# Results: A Prussian Blue electrochromic paste

Different paste formulations were explored and tested

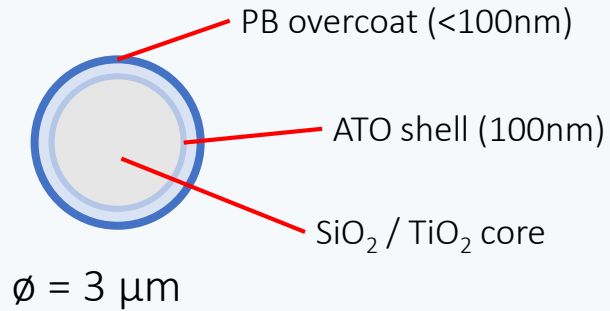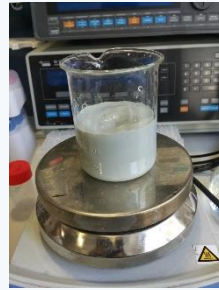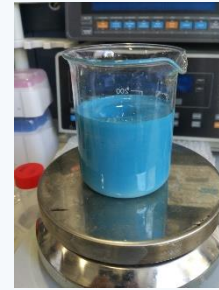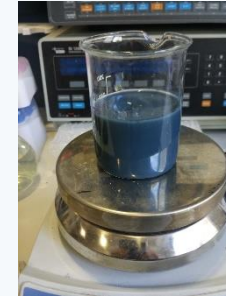

PB-based pigments

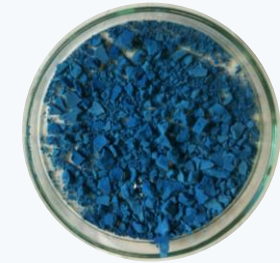

Homogeneity/grain size

Contact angle.

SEC

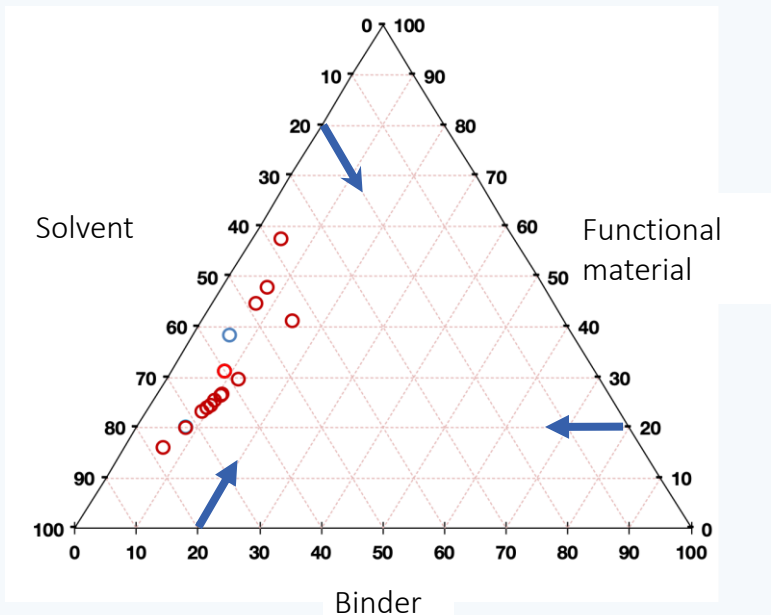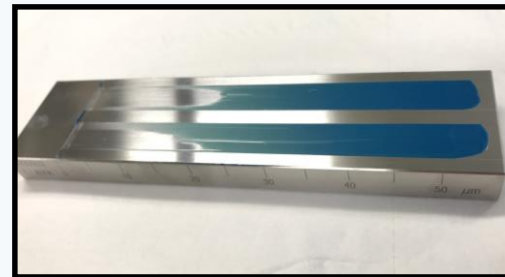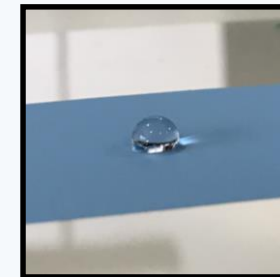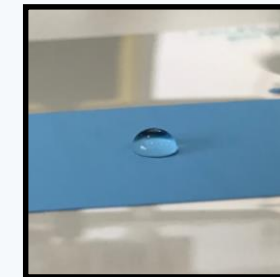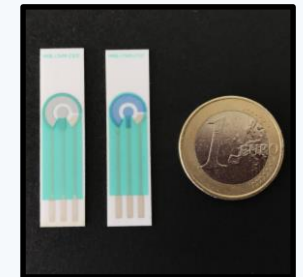

SEM

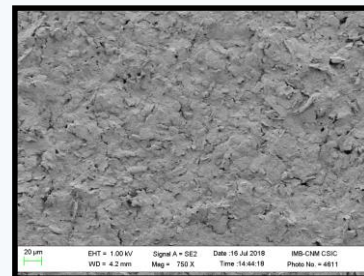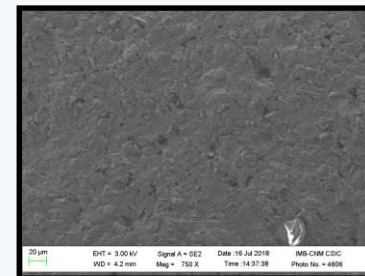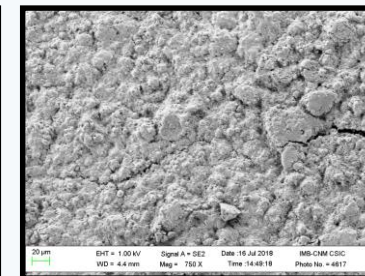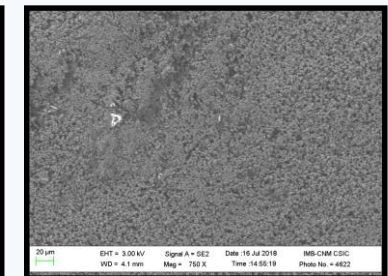

DropSens PB-C

Gwent Ltd. PB-C

PB-ITO

SiO<sub>2</sub>/ATO-PB

# Results: Making blue electrodes

## Spectroelectrochemistry of Screen-printed Prussian Blue electrodes

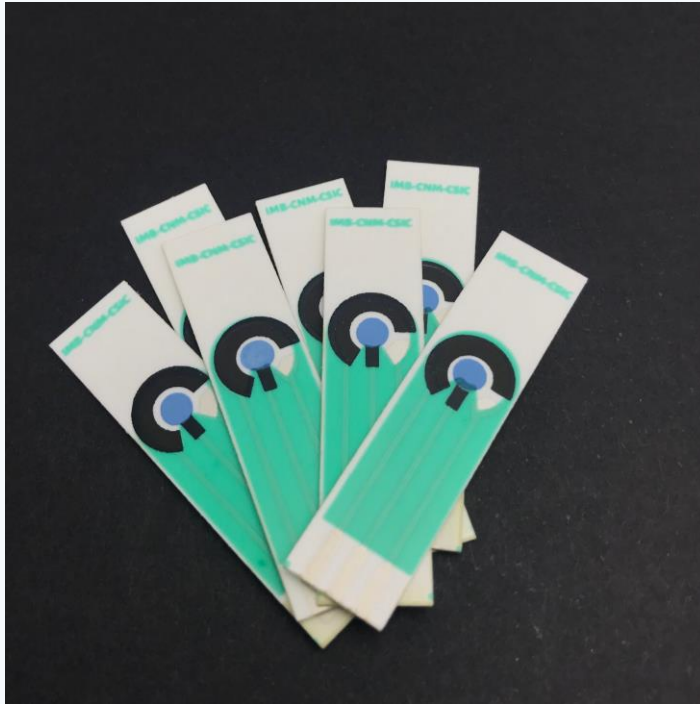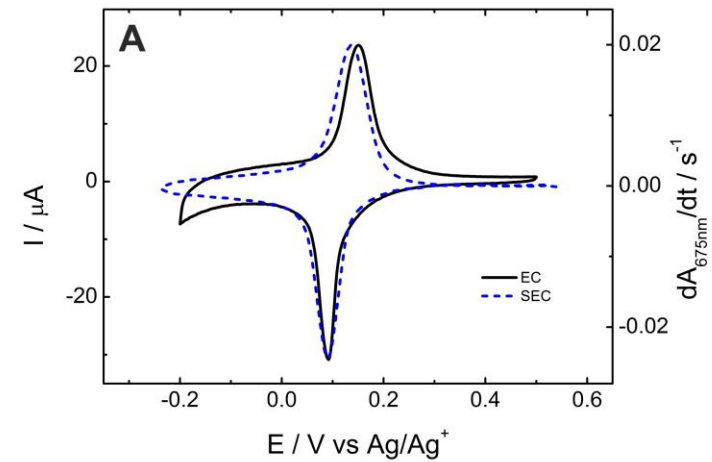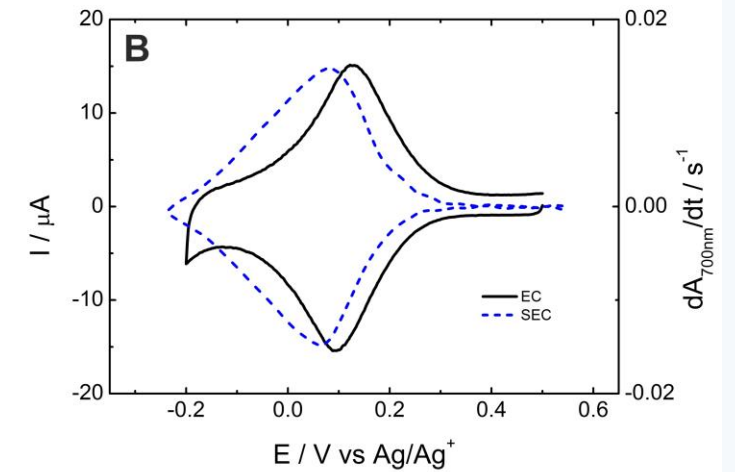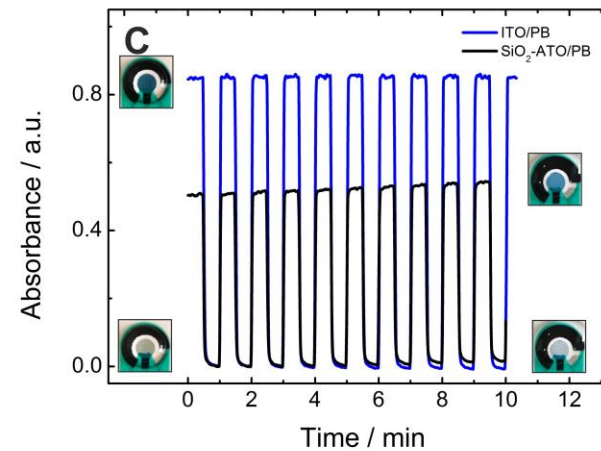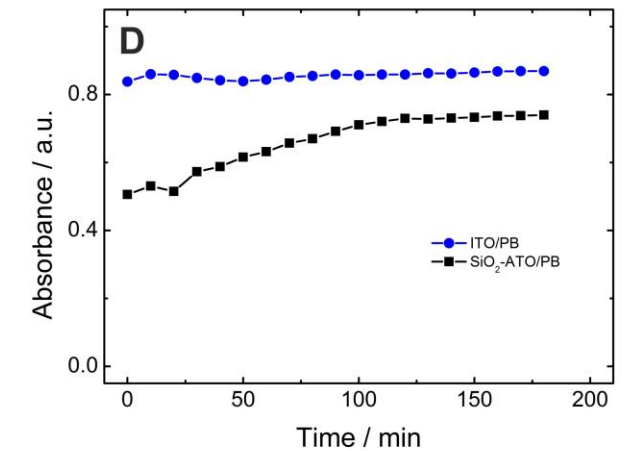

# Results: Electrochemical characterization

- The ATO-PB sensing material displays electrochemical redox behavior.
- Linear increase of anodic and cathodic peak currents of both PB/ES and PB/BG redox systems with the potential scan rate.
- Higher impedance of the PB/BG redox system.

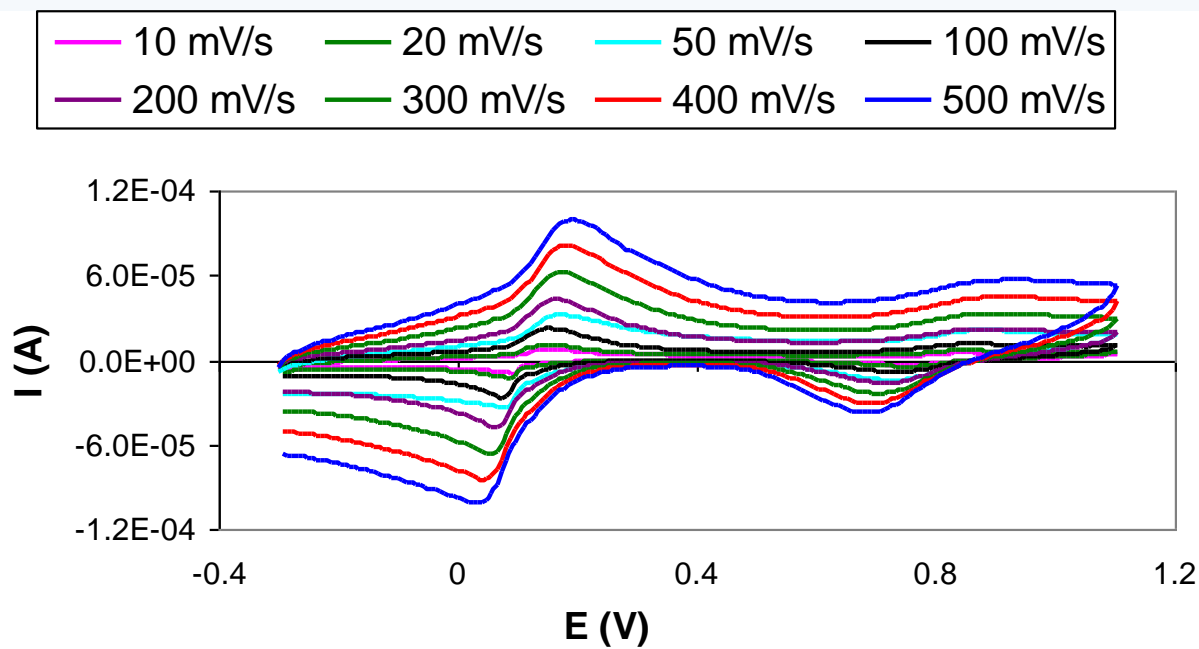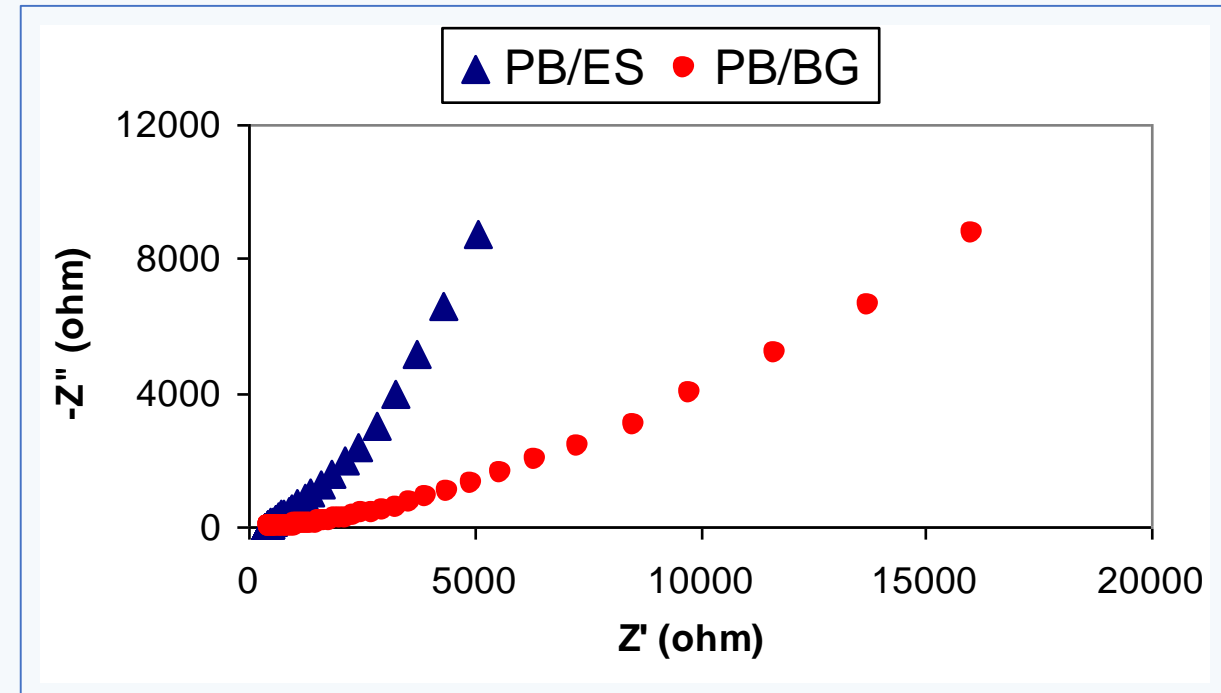

# Results: Electrochemical characterization

- The ATO-PB sensing material shows both pH and potassium concentration dependence.
- Linear increase of anodic and cathodic peak currents of both PB/ES and PB/BG redox systems in the presence of 100  $\mu\text{M}$  caffeic acid.

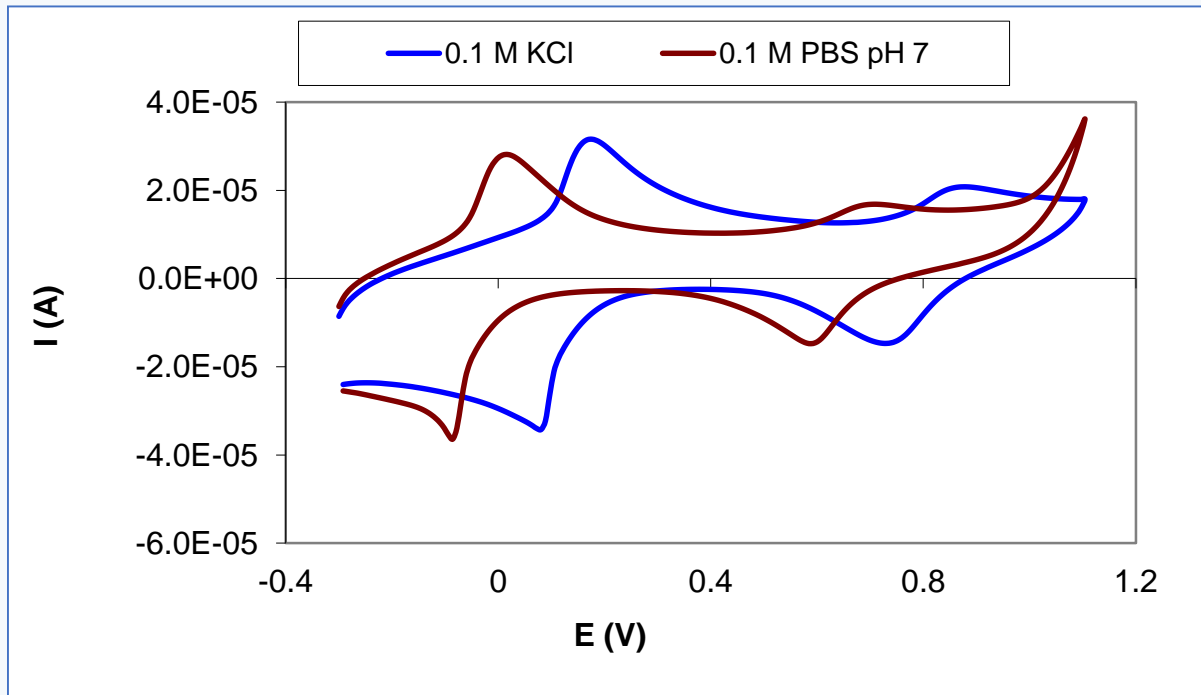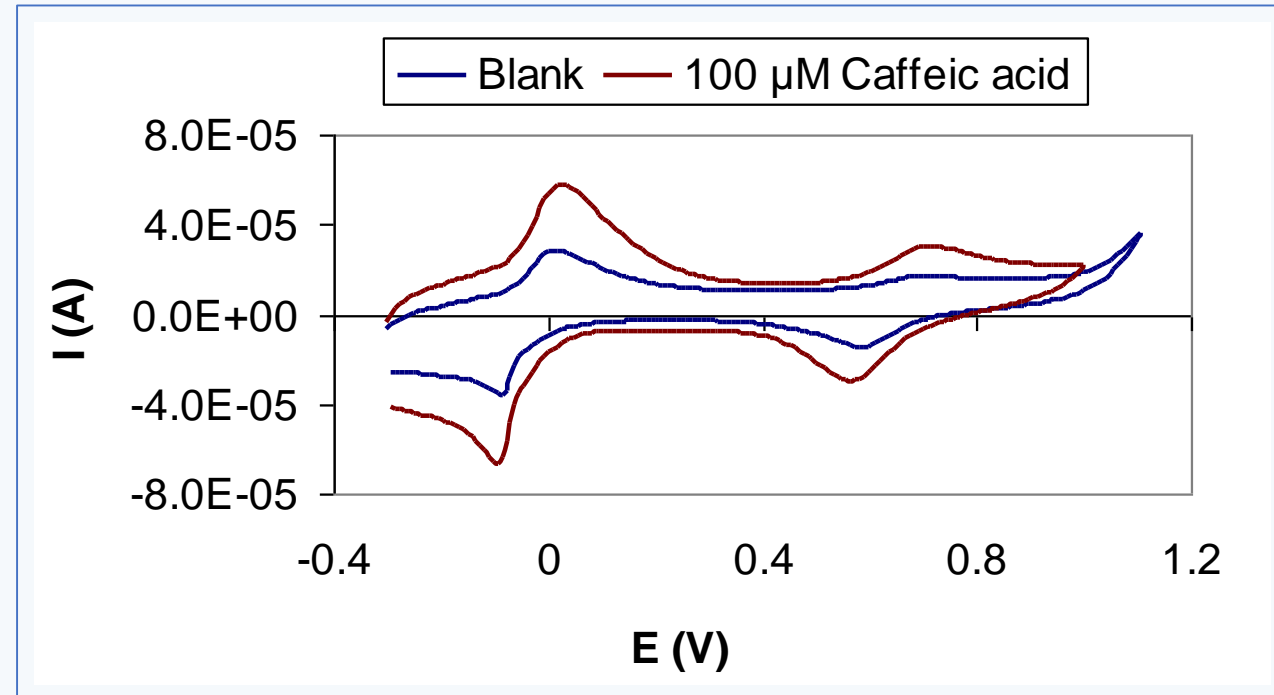



# Results: Analytical applications

- The ATO – PB composite materials displayed good electron transfer capabilities.
- The electrochemical redox behavior of PB component underpin the electroanalytical applications towards the detection of electroinactive species.
- The cathodic peak current of the Prussian blue/Everitt's salt redox system depends linearly on the potassium ion concentration in the range 0.1 to 10 mM.

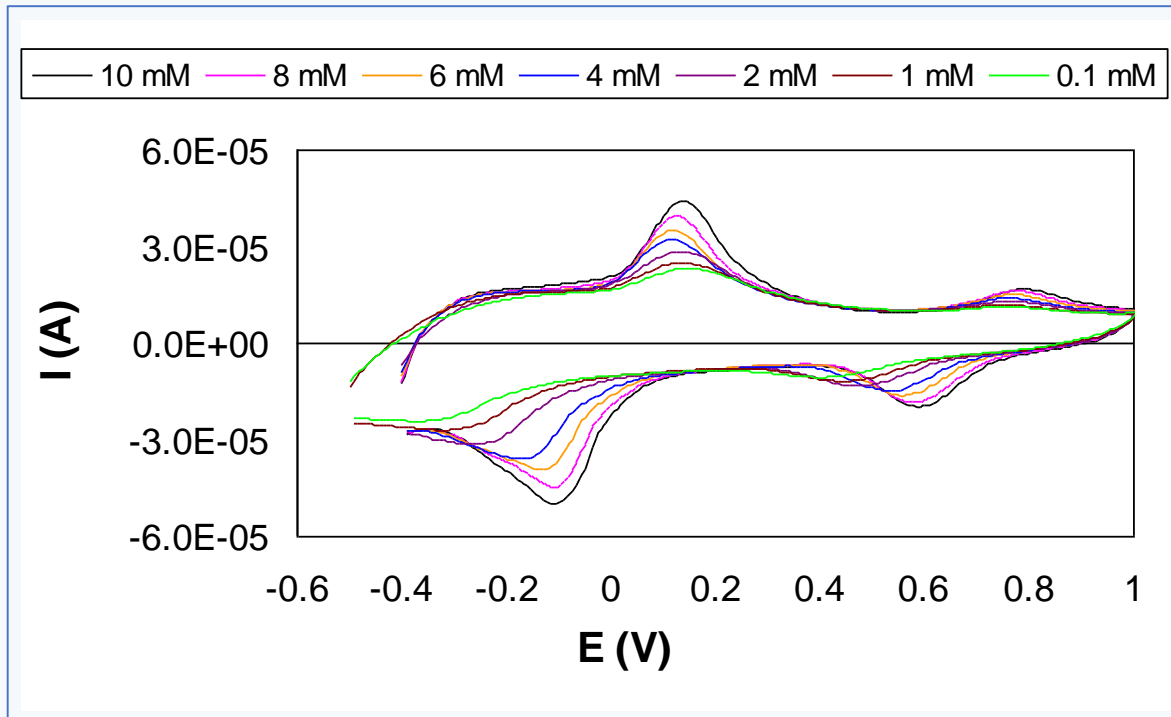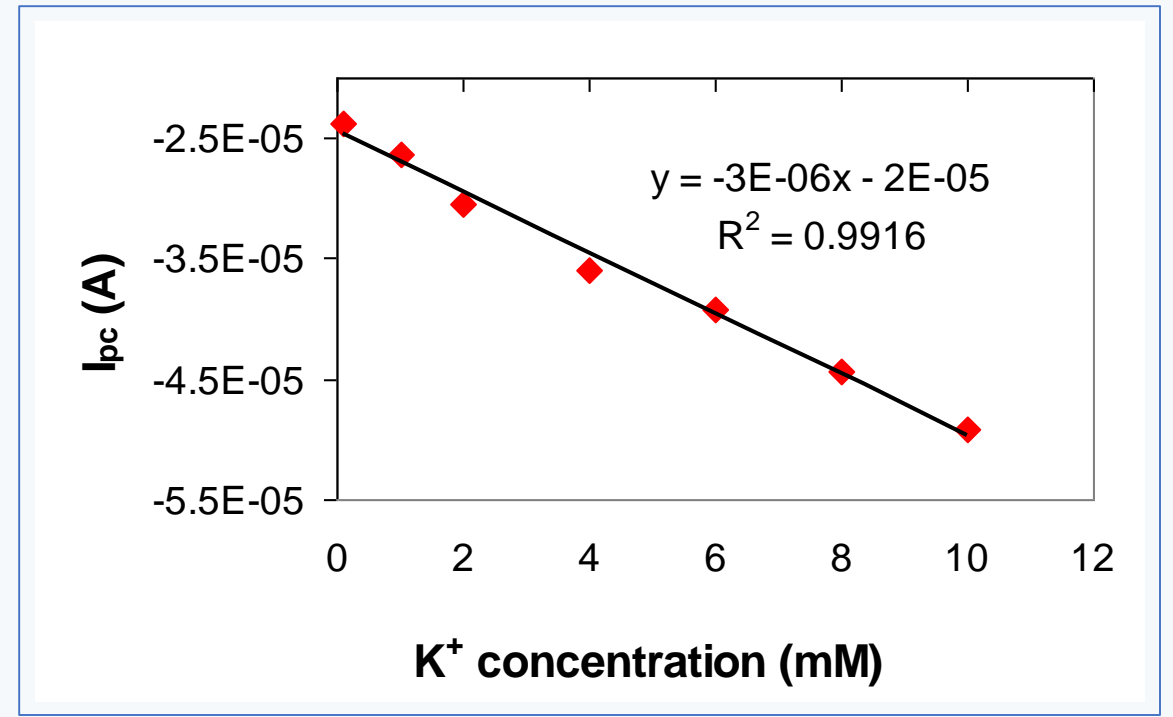

# Conclusions

- The ATO-PB-SPEs displayed good electron transfer capabilities.
- The Prussian blue/Everitt's salt redox system shows reversible and stable electrochemical behavior in potassium containing aqueous solution.
- The ATO-PB composite material is sensitive to pH changes.
- The cathodic peak currents of the Prussian blue/Everitt's salt redox system have shown a linear dependence on the potassium concentration.
- The ATO-PB-SPE sensor displayed a wide linear response range towards potassium ions over the range 0.1 to 10 mM.
- These results show the potential applications of the ATO-PB-SPEs in the electrochemical sensing of electroinactive species.



# Acknowledgments

- S.L. acknowledges the financial support from the Romanian National Authority for Scientific Research, CNCS–UEFISCDI, Project number PN-II-ID-PCE-2011-3-0271.

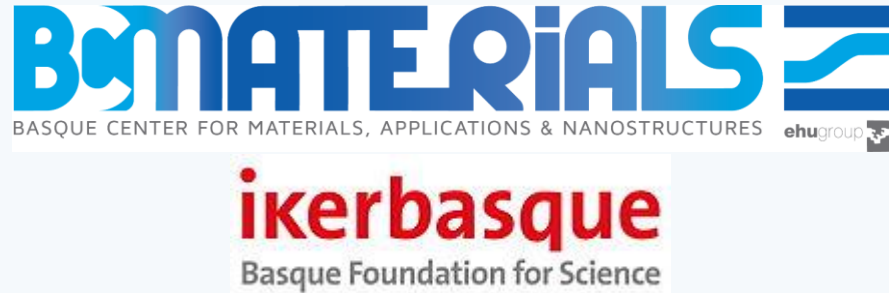

**THANK YOU FOR YOUR ATTENTION!**
